# Supplementary material for: LINE-1 retrotransposons facilitate horizontal gene transfer into poxviruses
Source: PubMed Central journal article supplement (PMC9578709; doi:10.7554/elife.63327), 2022-09-07

VC-R2  
M VC-P0 R1 R2 R3  
2 9 17 2 9 17 2 9 17

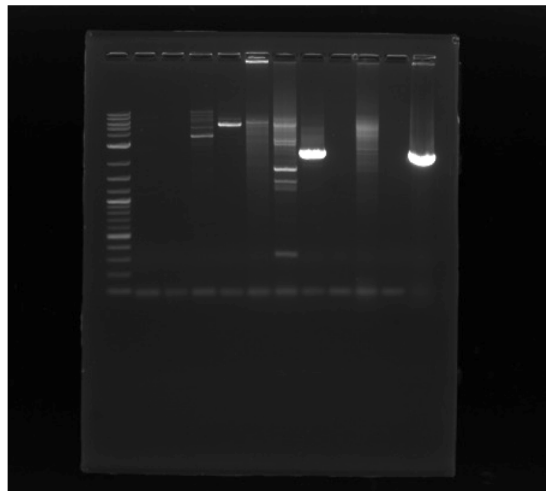

Supplement: elife-63327-fig5-data1.pdf [file elife-63327-fig5-data1.pdf]
