# Supplementary material for: LINE-1 retrotransposons facilitate horizontal gene transfer into poxviruses
Source: eLife. 2022 Sep 7;11:e63327. doi: 10.7554/eLife.63327 (PMC9578709; doi:10.7554/eLife.63327)
Supplement: Figure 3—source data 1. [file elife-63327-fig3-data1.xlsx]

## Sheet: Sheet1
VC-2		vP872		HGT1		HGT2		HGT3		HGT4		HGT5		HGT6		HGT7		HGT8		HGT9		HGT10		HGT11		HGT12		HGT13		HGT14		HGT15		HGT16		HGT17		HGT18		HGT19		HGT20
RK13	BSC40	RK13	BSC40	RK13	BSC40	RK13	BSC40	RK13	BSC40	RK13	BSC40	RK13	BSC40	RK13	BSC40	RK13	BSC40	RK13	BSC40	RK13	BSC40	RK13	BSC40	RK13	BSC40	RK13	BSC40	RK13	BSC40	RK13	BSC40	RK13	BSC40	RK13	BSC40	RK13	BSC40	RK13	BSC40	RK13	BSC40	RK13	BSC40
4.53849	4.4843	4.576	3.90313	3.40301	4.16031	3.33025	3.26776	1.58736	1.20871	3.68322	2.98512	5.17307	3.73999	2.99092	1.99554	4.8357	3.70131	4.28984	2.76615	2.43794	1.65173	2.81768	1.73812	1.99616	0.529016	4.16282	3.53097	0.014253	0.277547	3.61156	1.74728	4.16329	5.60435	5.19085	2.88903	3.61712	3.26228	2.55564	0.606625	3.17644	1.71071	4.37442	3.4673
4.50983	4.15898	4.21317	3.86138	3.39557	3.9516	3.16657	2.64782	2.20088	1.17229	3.06821	2.54037	4.85833	3.44702	2.98199	1.95935	4.28326	2.98857	3.94119	2.67954	2.41922	1.61422	2.80719	1.73162	1.54899	0.442869	3.92991	3.47936	0.012765	0.212781	3.43997	1.40152	3.64257	3.66826	5.07064	2.71078	3.5417	3.13548	2.27606	0.504346	3.07957	1.62378	4.17472	3.41616
3.96922	4.1134	4.10126	3.72339	3.35523	3.94448	3.06766	2.63827	1.86561	0.954656	2.92991	2.13627	4.23949	3.43786	2.93884	1.80829	4.20738	2.90798	3.67421	2.51601	2.40998	1.4547	2.80053	1.61594	1.49495	0.401989	3.81244	3.42415	0.010572	0.18028	3.33808	0.751351	3.46856	3.34874	4.64492	2.64876	3.51218	3.03579	2.1932	0.466442	2.81698	1.1719	4.00305	3.22069
3.80758	3.51343	3.82348	3.65949	3.28256	3.89498	2.82567	2.43848	2.09836	0.841491	2.65886	2.12013	4.16595	3.14206	2.89122	1.73075	4.13063	2.76106	3.61226	2.44624	2.39322	1.27089	2.72214	1.43864	1.45618	0.357741	3.74219	3.42407	0.010103	0.107448	3.14238	0.564101	3.00877	3.143	4.57467	2.58658	3.49158	2.92999	2.05545	0.456496	2.71039	1.02161	3.94495	3.03845
3.73115	3.49675	3.67664	3.60138	3.26423	3.81596	2.27136	2.28836	2.61477	0.699663	2.18287	1.98528	4.15036	3.06132	2.88621	1.62816	4.12515	2.52768	3.58994	2.33245	2.31686	1.17425	2.71204	1.4229	1.40356	0.326572	3.71611	3.40316	0.009789	0.095622	3.09382	1.31232	2.58611	2.88449	4.16454	2.43472	3.41421	2.73154	1.91847	0.45399	2.66145	1.00016	3.93649	2.98269
3.12538	3.46879	3.66982	3.47435	3.24865	3.77954	2.26768	1.85927	2.43222	0.655024	1.77798	1.96437	4.09061	3.00572	2.79411	1.56653	4.08215	2.5139	3.52823	2.32179	2.28115	1.16117	2.61015	1.35696	1.19391	0.317723	3.54421	3.23831	0.009711	0.086773	3.05694	1.31028	2.36487	2.87431	3.35265	2.40786	3.40042	2.66458	1.88809	0.442869	2.63122	0.935077	3.87775	2.91041
3.11371	3.27614	3.51139	3.45618	3.13423	3.6526	2.07432	1.75887	2.42094	0.415773	1.50364	1.83186	3.92114	2.94056	2.78401	1.53982	3.90328	2.32696	3.50975	2.23855	2.25914	1.16101	2.46323	1.30879	1.18874	0.312476	3.50035	3.23353	0.009633	0.086224	3.05419	1.25452	1.7609	2.84455	3.31381	2.26627	3.22108	2.61501	1.49033	0.442713	2.56543	0.648524	3.75174	2.89843
3.0473	3.10197	3.11363	3.28569	3.09609	3.35876	2.0065	1.69919	2.40316	0.338789	0.786827	1.69559	3.90383	2.93273	2.72237	1.52737	3.8902	2.2965	3.41616	2.16618	2.19712	1.01151	2.45493	1.3012	1.1878	0.310988	3.47216	2.90571	0.008458	0.085441	2.96311	1.19187	1.30778	2.79646	3.26604	2.11434	3.11176	2.5428	1.4807	0.416164	2.55408	0.595583	3.4832	2.87994
3.01433	2.51437	2.91244	3.19782	3.01864	3.27144	1.89028	3.59613	2.38609	0.187485	2.64962	1.59535	3.73702	2.41867	2.71822	1.46887	3.82489	2.24035	3.3969	2.0336	2.17167	0.999687	2.43958	1.25538	1.16031	0.310596	3.39392	2.86178	0.008066	0.082387	2.92662	1.17629	1.26314	2.78048	3.26235	1.97298	3.09852	2.47983	1.42494	0.388911	2.53097	0.560107	3.30261	2.86538
2.98778	2.09327	2.54946	2.82497	2.98786	3.05325	1.58634	3.18404	2.08411	1.76333	2.54335	1.38147	3.70467	2.31937	2.63137	1.45806	3.79583	2.20816	3.37113	1.91847	2.16814	0.881588	2.40669	1.24536	1.12233	0.289921	3.38734	2.65706	0.007988	0.081447	2.89858	1.14238	1.19939	2.70146	2.54562	1.831	3.04534	2.4612	1.34631	0.339807	2.52494	0.541546	3.20941	2.82982
2.7396	1.05717	2.50576	2.0242	2.97917	2.97596	3.93351	2.92176	2.07158	1.26447	2.528	1.21341	3.68909	2.23212	2.56535	1.45509	3.73913	2.10048	3.36753	1.8754	2.16806	0.880335	2.39345	1.21192	1.11849	0.281541	3.33111	2.63012	0.00791	0.081134	2.8595	1.12844	0.953873	2.44945	2.35884	1.7725	2.9267	2.39698	2.05772	0.339494	2.48798	0.458532	2.98207	2.74681
2.67593	0.742893	2.35876	4.0466	2.97815	2.52369	3.47012	2.92028	1.90962	1.23831	2.31874	1.17582	3.64751	1.94816	2.56347	1.41671	3.63223	2.04652	3.25468	1.85739	2.16211	0.82481	2.35884	1.16329	1.08207	0.278722	3.25538	2.61939	0.007831	0.072284	2.84235	1.12256	0.914794	2.42102	1.81157	1.65808	2.89882	2.38742	1.77351	0.330958	2.48508	0.415929	2.70671	2.67358
2.64289	3.69395	2.32947	3.31569	2.94863	2.0094	3.26416	2.90203	1.83632	1.20926	2.13125	1.17417	3.62205	1.93751	2.55439	1.3958	3.46472	2.04542	3.11262	1.82411	2.16211	0.822617	2.35884	1.12679	1.04323	0.271909	3.23494	2.48751	0.007518	0.064218	2.66622	1.09092	0.882841	2.28577	5.42838	0.73976	2.86099	2.36009	1.58532	0.321717	2.45031	0.397917	5.28624	2.39416
2.59488	3.61414	2.28334	3.20033	2.87611	1.38531	3.0993	2.80327	1.79575	1.1517	2.09766	0.990994	3.48594	1.73671	2.52103	1.36009	3.38821	1.81596	3.07041	1.69254	2.14003	0.795129	2.33299	1.12303	1.0112	0.263685	3.06994	2.26228	0.00744	0.061947	2.63936	1.08732	4.56136	2.27402	5.11645	3.52894	2.77453	2.33691	1.53301	0.314277	2.42822	0.384838	5.20119	2.38648
2.58885	3.48978	2.26596	3.14739	2.87125	4.05623	3.07393	2.75065	1.74767	1.09492	2.03477	0.959903	3.46699	3.98528	2.50764	1.35359	3.34161	1.73498	3.065	1.53834	2.13956	0.794894	2.28099	1.09641	1.01034	0.261023	3.03203	1.8227	0.007283	0.061477	2.51038	1.05459	4.09343	2.25664	4.49041	2.71423	2.68478	2.31757	1.43519	0.310361	2.40825	0.384525	4.74563	2.36432
2.5244	3.46754	2.26016	3.09547	2.85895	3.60005	2.99992	2.63827	1.70656	1.0946	1.91808	0.826768	3.42548	3.00282	2.44287	1.32305	3.27042	1.64414	3.0538	1.50395	2.08325	0.757851	2.27253	1.0343	0.982536	0.260475	3.00619	1.34646	0.007283	0.060537	2.47842	1.03665	3.99225	2.21811	4.22375	2.64038	2.67092	2.30543	1.22915	0.304879	2.40786	0.372778	4.69074	2.08818
2.43582	3.3662	2.20401	2.9256	2.70374	3.30089	2.98301	2.46315	1.60662	1.06954	1.90931	2.23252	3.36181	2.89044	2.43308	1.29838	3.26314	1.62934	3.0513	1.4731	2.0513	0.737489	2.26149	1.02412	0.979403	0.253035	2.95395	3.20949	0.006422	0.054115	2.39972	0.993187	3.95035	2.17425	4.18952	2.58297	2.58133	2.14974	2.81768	0.304409	2.40355	0.307463	4.44976	1.81784
2.22884	3.25115	2.13345	2.83703	2.69426	3.27692	2.97251	2.27387	1.54789	1.04323	1.81322	2.02044	3.30621	2.81494	2.41734	1.1383	3.23416	1.60976	3.02201	1.30785	2.00321	0.716579	2.2557	0.971728	0.966716	0.252408	2.87822	2.99812	0.006422	0.054115	2.33785	0.992012	3.83695	2.11136	4.07095	2.53246	2.47357	1.99436	2.59691	0.302765	2.37896	0.296813	4.38515	4.38406
2.14598	3.15694	2.02663	2.72371	2.59981	3.08301	2.90727	2.25366	1.48524	1.02678	1.70883	1.9675	3.29	2.74806	2.40567	1.1217	3.21278	1.4543	2.98261	3.61508	1.92388	0.659958	2.25115	0.968596	0.941734	0.244185	2.86765	2.87008	0.006422	0.0502	2.11841	0.960529	3.42204	2.07213	3.99146	2.5067	1.73592	1.84674	2.55439	0.300885	2.35672	0.246378	4.38476	3.07824
1.73843	3.10361	1.9115	2.64954	2.59214	3.07644	2.86851	2.21223	1.43817	0.990289	1.65761	1.87023	3.26337	2.67734	2.39384	1.09703	3.16227	1.43778	2.96695	3.12546	1.88809	0.581408	2.19023	0.965072	0.903751	0.240191	2.85833	1.83303	0.006343	0.050043	3.70781	0.950583	3.23706	2.06618	3.97862	2.4944	1.47318	1.64899	2.28217	0.297048	2.27496	0.217558	4.35813	3.0773
1.63122	3.07761	1.84282	2.63263	2.52894	3.04863	2.805	2.09625	1.43144	0.948547	1.61712	1.86264	3.21051	2.54852	2.35492	1.02686	3.13776	1.39565	2.96617	3.11857	1.8859	0.503328	2.17629	0.893884	0.834364	0.232516	2.78095	3.08356	0.005952	0.049965	3.59825	0.930926	3.14261	2.02874	3.82418	2.44929	1.10181	1.49432	2.1477	0.296891	2.26979	0.214582	4.143	2.76756
1.30974	3.04965	1.58109	2.61696	2.51218	2.97674	2.76944	1.9144	1.247	0.917613	1.28796	1.83914	3.20307	2.51672	2.34983	0.933981	3.10909	1.26854	2.90727	2.82779	1.86303	0.484455	2.17605	0.891143	0.816822	0.231576	2.74924	3.14371	0.005717	0.049182	3.23463	0.922468	2.97807	1.96319	3.57452	2.41413	4.30566	3.53309	2.13807	0.293523	2.26979	0.197275	4.09014	2.66051
1.21764	2.99452	4.0585	2.59519	2.43848	2.96327	2.74939	1.91017	1.11136	0.910878	1.19438	1.68032	3.05083	2.40254	2.33738	0.907432	3.06994	1.26713	2.90547	2.59551	1.85034	0.465424	2.16117	0.862479	0.7974	0.230558	2.71783	3.36283	0.00556	0.048712	3.14488	0.89592	2.91244	1.95998	3.37779	2.39345	4.27105	3.16007	2.13298	0.266818	2.25656	0.193672	3.90649	2.5894
1.03634	2.88425	3.76412	2.19399	2.43535	2.93006	2.74783	1.90046	0.998669	0.889341	2.37638	1.56418	3.02459	2.39784	2.32712	0.859034	3.03172	1.23487	2.89012	2.57452	1.84596	0.299554	2.15694	0.827786	0.790273	0.230558	2.70781	2.72167	0.005482	0.04832	3.08348	0.893257	2.87125	1.93241	3.04033	2.39228	3.81518	2.92435	2.10181	0.263999	2.24661	0.187877	3.82293	3.50286
3.00478	2.79419	3.48571	1.83444	2.39306	2.84642	2.56582	1.79701	2.74399	0.809695	2.37803	1.38092	2.87337	2.2817	2.31404	1.94784	3.0148	1.17433	2.87133	2.52745	1.7992	0.278644	2.12092	0.820033	0.789725	0.22492	2.70107	2.58493	0.005404	0.048007	3.06633	0.864594	2.80648	1.89443	2.58094	2.34537	3.47788	2.89271	2.08474	0.256872	2.21701	0.185762	3.78291	3.46707
2.83319	2.53724	3.18067	1.74297	2.23165	2.67037	2.56347	1.7898	2.30817	0.788315	2.85097	1.30551	2.83797	2.23197	2.30551	1.70162	2.87658	0.95959	2.81643	2.49957	1.78095	1.53309	2.07479	0.818858	0.788629	0.220299	2.48312	2.47827	0.005247	0.047459	2.88676	0.853943	2.43942	1.89271	2.49487	1.95873	3.43739	2.25711	2.07346	0.256715	2.13219	0.17284	3.33331	3.40309
2.47443	2.48203	2.96194	1.54147	2.21756	2.66372	2.541	1.69677	1.93931	0.782285	2.02052	1.27825	2.83421	2.22163	2.19258	1.66536	2.82904	0.898896	2.70914	2.47795	1.77821	1.33808	2.07393	0.77649	0.787297	0.216775	2.35202	2.43034	0.005012	0.046989	2.79536	0.842822	2.0491	1.88464	2.04769	1.91597	3.23181	1.79826	2.05216	0.251625	2.04754	0.172292	3.03352	3.39322
2.40551	2.46315	2.81917	3.53442	2.18631	2.6526	2.52792	1.63975	1.91981	0.773592	2.51735	1.1199	2.78808	2.1813	2.18318	1.62096	2.82504	0.897329	2.6887	2.47749	1.77806	1.21811	2.04973	1.51515	0.781424	0.213564	2.29219	2.16704	0.004856	0.046676	2.75965	0.836166	2.02765	1.87086	5.14653	1.56152	3.17574	1.16838	2.01911	0.250999	1.94816	0.154828	2.948	3.34388
2.3106	2.21536	2.64892	3.16751	2.12092	2.64735	2.4106	1.61602	1.5074	0.696217	2.43801	1.11638	2.70029	2.17174	2.14449	1.57358	2.82207	0.854726	2.67358	2.35986	1.75856	1.19101	2.04025	1.45751	0.764508	0.201347	2.26149	1.76647	0.004621	0.046127	2.74399	0.81737	3.6468	1.67084	3.97126	1.44859	3.16532	4.14277	1.98575	0.248101	1.85457	0.137834	2.83695	3.34271
1.88276	1.99444	2.5677	2.75339	2.02389	2.37732	2.33166	1.0531	1.47044	0.691205	2.16477	1.05083	2.68807	2.06359	2.1206	1.53653	2.77868	0.819328	2.64038	2.28452	1.71603	1.06727	2.04018	1.39839	0.753935	0.199389	2.1867	1.6132	0.004307	0.045971	2.73428	0.776568	3.59261	1.63725	3.74383	1.44498	3.09813	4.02725	1.97651	0.246848	1.74884	0.136346	2.81612	3.31976
1.84282	1.93273	2.48868	2.53152	1.96429	1.92051	2.32148	3.6031	0.873678	0.674368	2.12906	1.03743	2.67061	2.0578	2.1152	1.52855	2.69958	0.768893	2.62581	2.2658	1.70812	1.06296	2.02733	1.33542	0.751664	0.197823	1.9704		0.004307	0.045892	2.64273	0.755658	2.71501	1.60255	3.64155		3.07769	3.99303	1.95928	0.244263	1.71971	0.131334	2.77109	2.44397
1.23095	1.753	2.37936	2.51461	1.89984	1.72629	2.15483	2.4305	1.92082	0.582191	2.02882	0.909233	2.6457	2.05466	2.09406	1.51187	2.67609	0.716266	2.51727	2.1914	1.69935	1.04487	2.01825	1.33182	0.738664	0.196805	1.92662		0.004229	0.045344	2.64218	0.750959	2.49464	1.53277	2.85762		3.02866	3.86937	1.88182	0.236745	1.57068	0.128201	2.57311	2.09163
1.11739	1.64915	2.29548	2.1412	1.87211	1.65072	2.08951		2.24348	0.581878		0.805231	2.47592	2.02028	2.07189	1.50764	2.66066	0.689717	2.39134	2.18811	1.68572	0.91636	2.01652	1.25311	0.730206	0.185606	1.91424		0.004229	0.045188	2.59049	0.746339	5.10016	1.41695			2.94236	3.63325	1.8541	0.235179	1.08051	0.124755	2.42094
	1.57123	2.26275	1.92599	1.85379	1.55032	1.45477		2.54538	0.545775		0.69332	2.34623	1.96993	2.04793	1.44929	2.63748	0.597854	2.35108	2.07784	1.67382	0.898348	2.00634	1.2481	0.727622	0.182317	1.87188		0.004072	0.044718	2.35719	0.742345	4.55736	1.39768			2.79889	3.53708	1.81486	0.233926	2.80476	0.111129	2.31381
	1.4731	2.24755		1.7555	3.49009	1.13133		2.619	0.504581		0.659801	2.34474	1.94823	1.98622	1.41522	2.63639	0.558227	2.30143	1.70969	1.67327	0.862401	1.97212	1.18678	0.724176	0.181377	1.80578		0.003994	0.044169	2.35375	0.72582	4.26055	1.10486			2.78902	3.26752	1.6869	0.227504	2.77649	0.100948	2.20095
	1.26141	2.24113		1.73678	2.68776				0.498943			2.33151	1.88433	1.97251	1.38695	2.63474	2.67061	2.04033	1.11849	1.66035	0.825437	1.94111	1.07863	0.722296	0.172136	1.70679		0.003994	0.044013	2.27817	0.721748	3.54374	1.10071			2.75668	3.19837	1.63137	0.226721	2.73945	0.090923	1.92466
	0.949174	2.16987		1.70969	2.60529				0.491738			2.2882	1.8465	1.94534	1.37983	2.6338	2.49659	2.00885	1.05435	1.64359	0.82387	1.87329	1.07127	0.719868	0.171822	1.70146		0.003916	0.043935	2.2409	0.720887	3.53661	3.13658			2.69269	3.16548	1.62605	0.224215	2.69301	1.26744	1.60506
		2.11575		1.70514	2.44765				0.479756			2.22907	1.79975	1.93931	1.368	2.62894	2.40395	1.73929	3.38766	1.63521	0.81878	1.86522	1.04347	0.705302	0.169238			0.003916	0.043856	2.23173	0.650795	3.20894	2.53277			2.67304	3.12679	1.53497	0.219986	2.53403	1.21819
		2.07252		1.65181	2.13235				0.478189			2.07636	1.75096	1.93304	1.32187	2.62307	2.33895	1.68416	3.20879	1.61908	0.807503	1.86029	1.04292	0.702248	0.157491			0.003837	0.043308	2.16712	0.61618	2.94385	2.38014			2.67249	3.12123	1.50685	0.218106	2.35202	1.04182
		1.91119		1.63106	2.13157				0.467852			1.87289	1.71376	1.92795	1.31122	2.53082	2.24497		2.94126	1.58595	0.803352	1.82747	1.04284	0.69747	0.157412			0.003759	0.04323	2.14332	0.574516	2.87908	2.15483			2.65745	3.11027	1.47537	0.211293	2.3196	0.938288
		1.89341		1.61712	1.87548				0.439189			1.8104	1.70749	1.92474	1.30511	2.47466	2.23424		2.7548	1.58399	0.789803	1.75691	0.996006	0.695748	0.156394			0.003681	0.042838	2.0856	0.501762	2.7389	1.79881			2.54155	3.00603	1.47114	0.199076	2.2965	0.637873
		1.88801		1.55979	1.57671				0.41452			1.38022	1.68095	1.91229	1.30049	2.33902	2.14543		2.75198	1.56982	0.781894	1.75597	0.984807	0.682669	0.146292			0.003602	0.042055	1.78573	0.487117	2.4117	1.66943			2.38077	2.99937		0.197745	2.27105	0.346621
		1.76341		1.53505					0.383194			0.650638	1.56308	1.85355	1.29971	2.23925	2.07839		2.69919	1.55517	0.696531	1.71869	0.956144	0.660976	0.144334			0.003524	0.041898	1.7638	0.478973	2.3557	1.18224			2.3738	2.97392		0.193907	2.19547	0.334482
		1.71431		1.39071					0.382489				1.49143	1.80453	1.28452	2.21317	2.03274		2.66066	1.47748	0.641632	1.65354	0.940168	0.65847	0.140575			0.003524	0.041742	1.67969	0.42846	2.24207				2.36291	2.95982		0.192184	2.14316	0.23792
		1.31208		1.32759					0.380453				1.46026	1.80343	1.27747	2.13948	1.99193		2.59253	1.47044	0.632313	1.64171	0.937583	0.650717	0.136972			0.003524	0.041272	3.19884	0.266192	1.91049					2.76741		0.190148	2.13266	0.224215
		4.67766		1.32501					0.340356				1.38382	1.80155	1.22186	2.08959	1.96844		2.49808	1.37865	0.453285	1.59527	0.91683	0.648132	0.123737			0.003524	0.041272	3.15311	2.40035	1.0816					2.55877		0.188268	1.92576	0.215209
		4.05701		1.31843					0.290312				1.21309	1.80014	1.17738	1.98402	1.91017		2.34513	1.31475	0.432062	1.57522	0.902577	0.646174	0.120213			0.003524	0.041194	2.50192	1.54202	1.05701					1.63607		0.184823	1.91644	0.162503
		3.83609		1.24317					0.275589					1.75605	1.15389	1.96828	1.88746		2.3402	0.859425	0.345994	1.55643	0.84478	0.643042	0.109484			0.003524	0.040567	2.29955	1.40332								0.178322	1.8725	0.084971
		3.44389		1.18412					0.262746					1.73216	1.13729	1.85363	1.85073		2.29274		0.331741	1.52455	0.760984	0.617746	0.107213			0.003446	0.040332		1.00157								0.159762	1.75863	0.078471
		3.3633		1.18263					0.22954					1.6656	1.12507	1.61469	1.8057		2.2925		0.319915	1.50748	0.748923	0.603571	0.102201			0.003446	0.040175		0.938601								0.155298	1.60631
		3.13274		0.933354					0.179967					1.59503	1.1076	1.56864	1.46182		2.27872			1.47944		0.595426	0.086303			0.003446	0.040097		0.936722								0.15475	1.21255
		2.94855		0.912209					0.117707					1.5836	1.07597	1.41695	1.45704		2.25186			1.38609		0.594957	0.082309			0.003446	0.03994		0.853003								0.136033	1.20056
		2.90876							0.090297					1.57734	1.07432		1.38993		2.20573			1.35492		0.581565	0.078941			0.003368	0.039862		0.852064								0.13478
		2.86522												1.56582	1.0726		1.36205		2.15279			1.3514		0.578824	0.071658			0.003368	0.039549		0.849166								0.128201
		2.75769												1.50842	1.06696		0.555094		2.06594			1.30167		0.574595	0.045736			0.003289	0.039236		0.760435								0.125382
		2.67069												1.42909	1.04926				2.01386					0.573733	0.040959			0.003289	0.039157		0.696844								0.124677
		2.44444												1.33589	1.00439				1.94494					0.568956				0.003289	0.037669		0.6775								0.122719
		2.43183												1.12687	1.00399				1.91566					0.564805				0.003211	0.037591		0.526666								0.115279
		2.38601													0.922625				1.70013					0.561908				0.003211	0.037278		0.372308								0.113791
		2.21176													0.9173				1.57084					0.549691				0.003133	0.037278										0.109875
		1.98598													0.899366									0.544835				0.003133	0.036495										0.10502
		1.93782													0.867961									0.542094				0.003133	0.03626										0.104785
															0.859269									0.540606				0.003133	0.036181										0.081839
															0.733104									0.53763				0.003133	0.035555										0.079724
															0.715326									0.529407				0.003054	0.035007										0.079568
															0.646409									0.50513				0.003054	0.034537										0.073694
																								0.50372				0.003054	0.034537										0.068839
																								0.488214				0.003054	0.034458										0.058266
																								0.486804				0.003054	0.034458										0.045266
																								0.481165				0.003054	0.033754
																								0.45352				0.003054	0.033675
																								0.451484				0.002976	0.033597
																								0.432532				0.002976	0.033519
																								0.426893				0.002976	0.033284
																								0.398857				0.002976	0.033284
																								0.389615				0.002898	0.033127
																								0.35132				0.002898	0.03297
																								0.350771				0.002898	0.032892
																								0.338163				0.002898	0.032892
																								0.322578				0.002819	0.032657
																								0.311614				0.002819	0.032109
																								0.302843				0.002819	0.032109
																								0.292114				0.002819	0.031952
																								0.292114				0.002741	0.031874
																								0.285614				0.002741	0.031404
																								0.276607				0.002741	0.031013
																								0.263685				0.002741	0.030464
																								0.257264				0.002741	0.030386
																								0.247553				0.002741	0.030229
																								0.231028				0.002663	0.029995
																								0.230245				0.002663	0.029838
																								0.21701				0.002663	0.02976
																								0.214817				0.002663	0.02976
																								0.213486				0.002584	0.029603
																								0.200877				0.002584	0.029368
																								0.194769				0.002584	0.029368
																								0.177069				0.002584	0.029133
																								0.161798				0.002506	0.028976
																								0.110189				0.002506	0.028976
																												0.002506	0.028898
																												0.002506	0.028585
																												0.002506	0.028428
																												0.002428	0.028037
																												0.002428	0.027802
																												0.002428	0.027723
																												0.002428	0.027645
																												0.002428	0.027645
																												0.002428	0.027332
																												0.002349	0.02694
																												0.002349	0.026392
																												0.002349	0.026314
																												0.002349	0.026235
																												0.002349	0.026235
																												0.002271	0.026157
																												0.002271	0.026
																												0.002193	0.026
																												0.002193	0.025766
																												0.002193	0.025687
																												0.002193	0.025609
																												0.002193	0.025531
																												0.002193	0.025531
																												0.002193	0.024826
																												0.002114	0.024826
																												0.002114	0.024747
																												0.002114	0.024669
																												0.002114	0.024591
																												0.002114	0.024591
																												0.002114	0.024512
																												0.002114	0.024278
																												0.002036	0.024199
																												0.002036	0.023729
																												0.002036	0.023573
																												0.002036	0.023573
																												0.002036	0.023494
																												0.002036	0.023494
																												0.002036	0.023259
																												0.002036	0.023259
																												0.002036	0.023025
																												0.002036	0.022868
																												0.002036	0.022633
																												0.001958	0.022633
																												0.001958	0.022398
																												0.001958	0.022398
																												0.001958	0.022163
																												0.001958	0.022085
																												0.001958	0.022085
																												0.001958	0.022085
																												0.001958	0.022085
																												0.001958	0.022006
																												0.001958	0.022006
																												0.001958	0.021928
																												0.001958	0.021771
																												0.00188	0.021771
																												0.00188	0.021693
																												0.00188	0.021693
																												0.00188	0.021537
																												0.00188	0.021302
																												0.00188	0.020988
																												0.00188	0.02091
																												0.00188	0.020832
																												0.00188	0.020675
																												0.00188	0.020675
																												0.00188	0.020675
																												0.00188	0.02044
																												0.00188	0.02044
																												0.00188	0.020362
																												0.001801	0.020205
																												0.001801	0.020127
																												0.001801	0.020127
																												0.001801	0.019892
																												0.001801	0.019814
																												0.001801	0.019814
																												0.001801	0.019735
																												0.001801	0.019735
																												0.001723	0.019657
																												0.001723	0.0195
																												0.001723	0.019422
																												0.001723	0.019422
																												0.001723	0.019265
																												0.001723	0.019187
																												0.001723	0.019109
																												0.001723	0.019109
																												0.001645	0.019109
																												0.001645	0.01903
																												0.001645	0.018796
																												0.001645	0.018717
																												0.001645	0.018717
																												0.001645	0.018639
																												0.001645	0.018482
																												0.001645	0.018482
																												0.001645	0.018404
																												0.001566	0.018326
																												0.001566	0.018326
																												0.001566	0.018012
																												0.001566	0.017934
																												0.001566	0.017934
																												0.001566	0.017856
																												0.001488	0.017777
																												0.001488	0.017777
																												0.001488	0.017699
																												0.001488	0.017699
																												0.001488	0.017699
																												0.001488	0.017699
																												0.001488	0.017386
																												0.001488	0.017308
																												0.001488	0.017308
																												0.001488	0.017229
																												0.001488	0.017229
																												0.001488	0.017073
																												0.001488	0.016994
																												0.001488	0.016838
																												0.001488	0.016759
																												0.001488	0.016681
																												0.001488	0.016603
																												0.001488	0.016603
																												0.00141	0.016446
																												0.00141	0.016368
																												0.00141	0.016368
																												0.00141	0.016289
																												0.00141	0.016289
																												0.00141	0.016055
																												0.00141	0.015976
																												0.00141	0.015976
																												0.00141	0.015898
																												0.00141	0.015898
																												0.00141	0.015741
																												0.00141	0.015663
																												0.00141	0.015585
																												0.00141	0.015585
																												0.00141	0.015506
																												0.00141	0.015271
																												0.00141	0.015036
																												0.001331	0.014958
																												0.001331	0.014958
																												0.001331	0.01488
																												0.001331	0.014645
																												0.001331	0.014645
																												0.001331	0.014567
																												0.001331	0.014488
																												0.001331	0.014253
																												0.001331	0.014253
																												0.001331	0.014175
																												0.001331	0.014018
																												0.001331	0.014018
																												0.001331	0.013862
																												0.001331	0.013783
																												0.001331	0.013783
																												0.001331	0.013783
																												0.001331	0.013783
																												0.001331	0.013705
																												0.001331	0.013705
																												0.001253	0.013627
																												0.001253	0.01347
																												0.001253	0.01347
																												0.001253	0.013392
																												0.001253	0.013392
																												0.001253	0.013392
																												0.001253	0.013392
																												0.001253	0.013313
																												0.001253	0.013157
																												0.001253	0.013079
																												0.001253	0.013079
																												0.001253	0.012844
																												0.001253	0.012844
																												0.001253	0.012765
																												0.001253	0.012687
																												0.001253	0.012687
																												0.001253	0.012687
																												0.001253	0.012609
																												0.001253	0.01253
																												0.001253	0.012452
																												0.001253	0.012295
																												0.001253	0.012295
																												0.001253	0.012139
																												0.001175	0.012139
																												0.001175	0.012139
																												0.001175	0.01206
																												0.001175	0.011904
																												0.001175	0.011904
																												0.001175	0.011904
																												0.001175	0.011904
																												0.001175	0.011747
																												0.001175	0.011591
																												0.001175	0.011512
																												0.001175	0.011356
																												0.001175	0.011277
																												0.001175	0.011199
																												0.001175	0.011199
																												0.001175	0.011042
																												0.001175	0.011042
																												0.001175	0.010964
																												0.001175	0.010886
																												0.001175	0.010886
																												0.001175	0.010886
																												0.001175	0.010651
																												0.001175	0.010338
																												0.001175	0.010181
																												0.001175	0.010181
																												0.001175	0.010024
																												0.001175	0.009946
																												0.001175	0.009868
																												0.001175	0.009868
																												0.001175	0.009868
																												0.001175	0.009476
																												0.001175	0.009398
																												0.001175	0.009398
																												0.001175	0.009241
																												0.001175	0.009085
																												0.001175	0.009006
																												0.001096	0.008771
																												0.001096	0.008771
																												0.001096	0.008693
																												0.001096	0.008693
																												0.001096	0.008615
																												0.001096	0.008615
																												0.001096	0.00838
																												0.001096	0.00838
																												0.001096	0.00838
																												0.001096	0.00838
																												0.001096	0.008301
																												0.001096	0.008301
																												0.001096	0.008301
																												0.001096	0.008301
																												0.001096	0.008301
																												0.001096	0.008223
																												0.001096	0.008223
																												0.001096	0.008145
																												0.001096	0.007988
																												0.001096	0.00791
																												0.001096	0.007831
																												0.001096	0.007675
																												0.001018	0.007675
																												0.001018	0.007675
																												0.001018	0.007675
																												0.001018	0.007597
																												0.00094	0.007597
																												0.00094	0.007597
																												0.00094	0.007597
																												0.00094	0.007597
																												0.00094	0.007597
																												0.00094	0.007518
																												0.00094	0.007518
																												0.000861	0.007518
																												0.000861	0.007518
																												0.000861	0.007518
																												0.000861	0.00744
																												0.000861	0.00744
																												0.000861	0.00744
																												0.000861	0.00744
																												0.000783	0.00744
																												0.000783	0.00744
																												0.000783	0.00744
																												0.000783	0.007362
																												0.000783	0.007362
																												0.000783	0.007362
																												0.000783	0.007362
																												0.000783	0.007362
																												0.000705	0.007283
																												0.000705	0.007283
																												0.000705	0.007283
																												0.000548	0.007205
																												0.000548	0.00697
																												0.000548	0.006892
																												0.000548	0.006813
																												0.000548	0.006422
																												0.00047	0.006343
																												0.00047	0.006187
																													0.006187
																													0.006109
																													0.00603
																													0.00603
																													0.005952
																													0.00556
																													0.005169
																													0.00509
																													0.005012
																													0.005012
																													0.004699
																													0.004542
																													0.004464
																													0.004072
																													0.003994
																													0.003994
																													0.003994
																													0.003759
																													0.003759
																													0.003759
