# Supplementary material for: LINE-1 retrotransposons facilitate horizontal gene transfer into poxviruses
Source: eLife. 2022 Sep 7;11:e63327. doi: 10.7554/eLife.63327 (PMC9578709; doi:10.7554/eLife.63327)
Supplement: Figure 3—source data 2. [file elife-63327-fig3-data2.xlsx]

## Sheet: Sheet1
Dunn's multiple comparisons test	Adjusted P Value
vP872 vs. VC-2	>0.9999
vP872 vs. HGT1	>0.9999
vP872 vs. HGT2	>0.9999
vP872 vs. HGT3	0.0275
vP872 vs. HGT4	0.9343
vP872 vs. HGT5	>0.9999
vP872 vs. HGT6	0.3743
vP872 vs. HGT7	>0.9999
vP872 vs. HGT8	>0.9999
vP872 vs. HGT9	0.0027
vP872 vs. HGT10	0.06
vP872 vs. HGT11	<0.0001
vP872 vs. HGT12	>0.9999
vP872 vs. HGT13	<0.0001
vP872 vs. HGT14	>0.9999
vP872 vs. HGT15	>0.9999
vP872 vs. HGT16	0.0974
vP872 vs. HGT17	>0.9999
vP872 vs. HGT18	0.009
vP872 vs. HGT19	>0.9999
vP872 vs. HGT20	0.1596
