# Supplementary material for: LINE-1 retrotransposons facilitate horizontal gene transfer into poxviruses
Source: eLife. 2022 Sep 7;11:e63327. doi: 10.7554/eLife.63327 (PMC9578709; doi:10.7554/eLife.63327)
Supplement: Figure 3—source data 4. [file elife-63327-fig3-data4.xlsx]

## Sheet: Sheet1
Samples	Plaques expressing mCherry and EGFP	Plaques expressing only GFP
HGT1	1	0
HGT2	24	93
HGT3	26	338
HGT4	81	555
HGT5	1	0
HGT6	111	235
HGT7	1	0
HGT8	33	53
HGT9	1	0
HGT10	1	0
HGT11	1	0
HGT12	1	0
HGT13	1	0
HGT14	50	127
HGT15	1	0
HGT16	1	0
HGT17	1	0
HGT18	62	92
HGT19	180	168
HGT20	1	0
