# Supplementary material for: LINE-1 retrotransposons facilitate horizontal gene transfer into poxviruses
Source: eLife. 2022 Sep 7;11:e63327. doi: 10.7554/eLife.63327 (PMC9578709; doi:10.7554/eLife.63327)
Supplement: Figure 4—source data 1. [file elife-63327-fig4-data1.xlsx]

## Sheet: Sheet1
	Numbers of plaques expressing only EGFP in RK13+E3+K3 cells	Numbers of plaques expressing mCherry and EGFP in RK13+E3+K3 cells	Total
HGTLR2-P.P2-1	130	5	135
HGTLR2-P.P2-2	123	6	129
P2(1)-1	150	44	194
P2(1)-2	147	52	199
P2(2)-1	137	70	207
P2(2)-2	161	65	226
P2(3)-1	200	52	252
P2(3)-2	151	63	214
P9(1)-1	55	81	136
P9(1)-2	83	132	215
P9(2)-1	54	52	106
P9(2)-2	49	55	104
P9(3)-1	60	91	151
P9(3)-2	39	90	129
P17(1)-1	32	174	206
P17(1)-2	35	164	199
P17(2)-1	25	81	106
P17(2)-2	34	59	93
p17(3)-1	26	69	95
p17(3)-2	38	60	98
