# Supplementary material for: LINE-1 retrotransposons facilitate horizontal gene transfer into poxviruses
Source: eLife. 2022 Sep 7;11:e63327. doi: 10.7554/eLife.63327 (PMC9578709; doi:10.7554/eLife.63327)
Supplement: Figure 4—source data 2. [file elife-63327-fig4-data2.xlsx]

## Sheet: Sheet1
Samples (in RK13 cells)	Titer (pfu/mL)
P0-48hr-1	2128500
P0-48hr-2	3795000
P2(1)-48hr-1	8085000
P2(1)-48hr-2	4785000
P2(2)-48hr-1	1188000
P2(2)-48hr-2	2013000
P2(3)-48hr-1	742500
P2(3)-48hr-2	874500
P9(1)-48hr-1	23760000
P9(1)-48hr-2	19800000
P9(2)-48hr-1	12375000
P9(2)-48hr-2	8250000
P9(3)-48HR-1	44550000
P9(3)-48HR-2	15345000
P17(1)-48hr-1	19635000
P17(1)-48hr-2	11220000
P17(2)-48hr-1	12540000
P17(2)-48hr-2	21120000
P17(3)-48hr-1	12540000
P17(3)-48hr-2	10230000
