# Supplementary material for: LINE-1 retrotransposons facilitate horizontal gene transfer into poxviruses
Source: eLife. 2022 Sep 7;11:e63327. doi: 10.7554/eLife.63327 (PMC9578709; doi:10.7554/eLife.63327)
Supplement: Figure 4—source data 3. [file elife-63327-fig4-data3.xlsx]

## Sheet: Sheet1
Samples (in BSC40 cells)	Titer (pfu/ml)
P0-48hr-1	181500
P0-48hr-2	132000
P2(1)-48hr-1	379500
P2(1)-48hr-2	379500
P2(2)-48hr-1	726000
P2(2)-48hr-2	1105500
P2(3)-48hr-1	478500
P2(3)-48hr-2	660000
P9(1)-48hr-1	13200000
P9(1)-48hr-2	16665000
P9(2)-48hr-1	7260000
P9(2)-48hr-2	11550000
P9(3)-48HR-1	17160000
P9(3)-48HR-2	9240000
P17(1)-48hr-1	29700000
P17(1)-48hr-2	10395000
P17(2)-48hr-1	12045000
P17(2)-48hr-2	11715000
P17(3)-48hr-1	17655000
P17(3)-48hr-2	18645000
